# Supplementary material for: In situ synthesis of chiral AuNCs with aggregation-induced emission using glutathione and ceria precursor nanosheets for glutathione biosensing
Source: Royal Society of Chemistry journal article supplement (doi:10.1039/d2an00939k), 2022-01-01
Supplement: d2an00939k1.pdf [file d2an00939k1.pdf]

***In situ* Synthesis of Chiral AuNCs with Aggregation-Induced Emission Using  
Glutathione and Ceria Precursor Nanosheets for Glutathione Biosensing**

Mohamed Ibrahim Halawa <sup>a,b,c,d,e</sup>, Guoxing Wu <sup>a</sup>, Alaa Eldin Salem<sup>e</sup>, Lei Su <sup>b,\*</sup>, Bing Shi Li

<sup>a,\*</sup>, Xueji Zhang <sup>b,c,\*</sup>

<sup>a</sup> College of Chemistry and Environmental Engineering, Shenzhen University, Shenzhen 518060, China

<sup>b</sup> Guangdong Laboratory of Artificial Intelligence & Digital Economy (SZ), Shenzhen University, Shenzhen 518060, Peoples R China

<sup>c</sup> College of Biomedical Engineering, International Health Science Innovation Center, Shenzhen Key Laboratory for Nano-Biosensing Technology, Health Science center, Shenzhen University, Shenzhen 518060, China

<sup>d</sup> Department of Pharmaceutical Analytical Chemistry, Faculty of Pharmacy, Mansoura University, Mansoura, 35516, Mansoura, Egypt. Email: m\_halawa88@hotmail.com

<sup>e</sup> Department of chemistry, College of Science, United Arab Emirates University, Al Ain, United Arab Emirates

**\* Corresponding Author. E-mails:** [sulei@szu.edu.cn](mailto:sulei@szu.edu.cn), [phbingsl@szu.edu.cn](mailto:phbingsl@szu.edu.cn);

[zhangxueji@szu.edu.cn](mailto:zhangxueji@szu.edu.cn)

## **Chemicals and Materials.**

Cerium(III) nitrate hexahydrate ( $\text{Ce}(\text{NO}_3)_3 \cdot 6\text{H}_2\text{O}$ ), ammonium bicarbonate and sodium hydroxide were received from Alfa Aesar Co., Ltd., Aladdin Industrial Corporation and Xilong Scientific Co., Ltd; respectively. Gold(III) chloride trihydrate ( $\text{HAuCl}_4 \cdot 3\text{H}_2\text{O}$ ) and glutathione(GSH) were received from Energy Chemical Co., Ltd. 20.0 mg of the as-synthesized cerium carbonate  $\text{Ce}(\text{CO}_3)_2$  NS were dispersed in 2.0 mL distilled water by ultrasonication for preparing a colloidal stock solution of (10 mg/mL).

## **Instruments.**

Photoluminescence (PL) and Circular Dichroism (CD) spectra of the NCs samples were recorded by a HITACHI F7000 and Bio-logic MOS-450 photospectrometer; respectively. High Resolution Transmission Electron Microscopic (HRTEM) images of AuNCs and  $\text{Ce}(\text{CO}_3)_2$  NS were obtained using on a JEOL JEM-2100 microscope biased at 200 kV. Atomic Force Microscope (AFM) and Scanning Electron Microscope (SEM) images of  $\text{Ce}(\text{CO}_3)_2$  NS were taken on a BRUKER Multi Mode 8 and JEOL JSM-7800F, respectively. X-ray photoelectron spectroscopy (XPS) measurements were performed on a Thermo Fisher Scientific K-Alpha+ spectrometer. X-ray powder diffraction (XRD) patterns were recorded on a PANalytical B.V. Empyrean X-ray diffractometer with Cu K $\alpha$  radiation ( $\lambda = 0.154056$  nm).

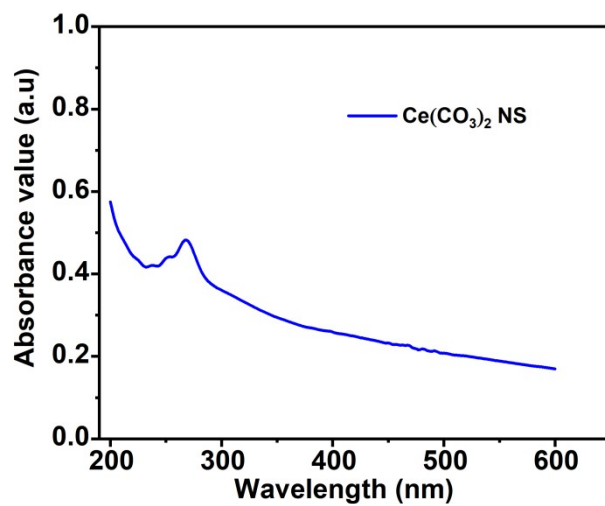

**Figure S1.** Absorption spectrum of  $\text{Ce}(\text{CO}_3)_2$  NS solution.

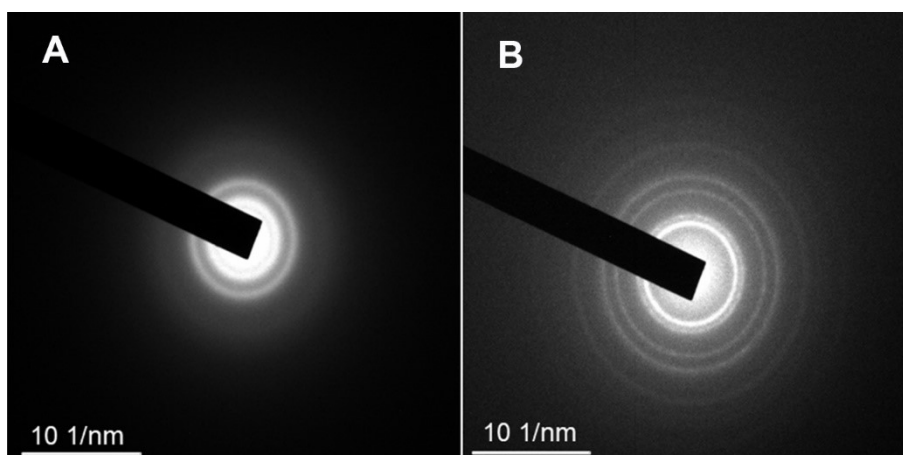

**Figure S2.** SAED images of insitu synthesized  $\text{Au}_0@Au(I)$ -SG NCs (A) and  $\text{Ce}(\text{CO}_3)_2$  NS (B)

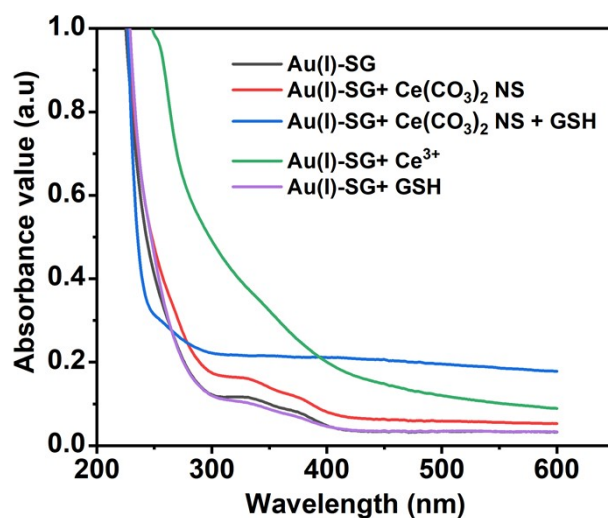

**Figure S3.** Absorption spectra for solution of Au(I)-SG oligomers in the absence (black line) and presence of  $\text{Ce}^{3+}$  ions (green line), or GSH (light magenta line) and absorption spectra for solutions of the conjugate probe of Au(I)-SG/ $\text{Ce}(\text{CO}_3)_2$  NS in the absence (red line) and presence of GSH (purple line).

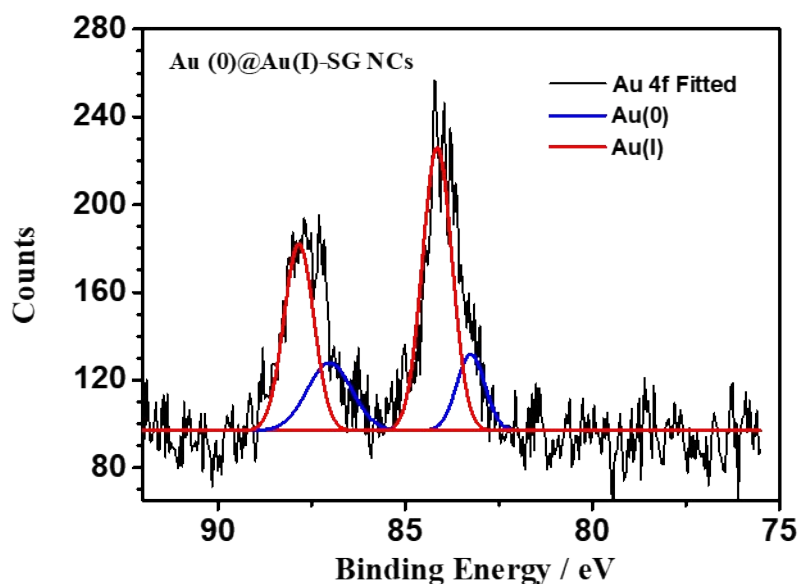

**Figure S4.** The Au ( $4f_{7/2}$ ) spectrum of the as-synthesized luminescent Au(0)@Au(I)-SG nanoclusters

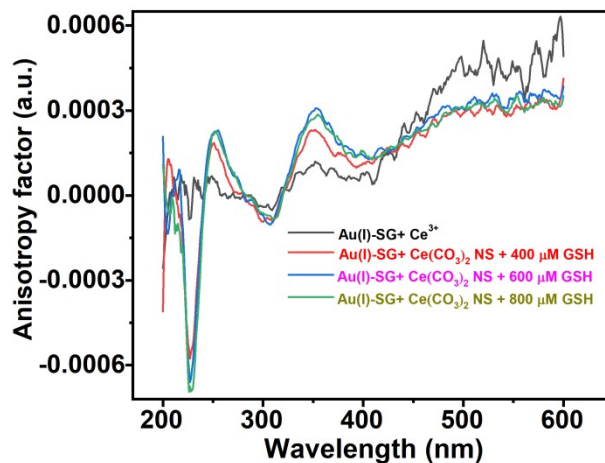

**Figure S5.** Anisotropy factor spectra for solution of Au(I)-SG oligomers in presence of 50  $\mu\text{M}$   $\text{Ce}^{3+}$  ions and solutions of the conjugate probe of Au(I)-SG/ $\text{Ce}(\text{CO}_3)_2$  NS in presence of GSH (400, 600, 800  $\mu\text{M}$ ).

**Table S1.** XPS data of the synthesized  $\text{Ce}(\text{CO}_3)_2$  NS

| Name     | Peak BE | Height   |         | Area (P)  |          | Atomic % |
|----------|---------|----------|---------|-----------|----------|----------|
|          |         | CPS      | FWHM eV | CPS.eV    | Area (N) |          |
| C1s-Ce4s | 284.8   | 14082.06 | 3.04    | 85384.39  | 1197.29  | 40.95    |
| O1s      | 531.07  | 73645.64 | 3.19    | 246206.39 | 1427.36  | 48.82    |
| Ce3d     | 884.41  | 66153.56 | 6.74    | 782059.17 | 298.78   | 10.22    |

Table S2: Repeatability and reproducibility results for GSH sensing using Au(I)-SG/ $\text{Ce}(\text{CO}_3)_2$  NS probe

| GSH amount ( $\mu\text{M}$ ) | % Recovery <sup>a</sup> $\pm$ % RSD |                     |
|------------------------------|-------------------------------------|---------------------|
|                              | Intra-day precision                 | Inter-day precision |
| 200                          | 99.13 $\pm$ 1.90                    | 98.84 $\pm$ 2.31    |
| 500                          | 99.98 $\pm$ 1.75                    | 101.35 $\pm$ 2.84   |
| 1000                         | 100.50 $\pm$ 1.82                   | 100.90 $\pm$ 2.62   |

<sup>a</sup> refers to average value of three assays.

**Table S3.** Comparison of AIE-based probe for GSH sensing with some previous methods.

| Technique         | Applied Materials*                                       | Linear range ( $\mu\text{M}$ ) | LOD ( $\mu\text{M}$ ) | Ref.     |
|-------------------|----------------------------------------------------------|--------------------------------|-----------------------|----------|
| Colorimetry       | AgNPs                                                    | 0-400                          | 4.11                  | 1        |
| Colorimetry       | Coumarin derivatives                                     | 0 -180                         | 6.84                  | 2        |
| Colorimetry       | $\text{Cu}^{2+}$ /Imidazole derivatives                  | 7.5-37.5                       | 2.98                  | 3        |
| Colorimetry       | Cytidine-AuNCs                                           | 0-400                          | 10                    | 4        |
| Colorimetry       | NDP                                                      | $0-80 \times 10^3$             | 178                   | 5        |
| Chronoamperometry | AuNPs-PEDOT/ GCE                                         | 0.5-10                         | 0.1                   | 6        |
| CV                | AuNPs/ $\text{Al}_2\text{O}_3$ . $\text{TiO}_2$ NPs /GCE | 5-50, 100-750                  |                       | 7        |
| DPV               | PDI-SH/ CPE                                              | $(0.5-5) \times 10^3$          | 17                    | 8        |
| CV                | Graphene modified-SPCE                                   | 1-100                          | 8.01                  | 9        |
| HPLC-ED           | Reversed C18- HPLC                                       | 5.1–325.4                      | 2.3                   | 10       |
| Fluorimetry       | Au(I)-SG/ $\text{Ce}(\text{CO}_3)_2$ NS                  | 0-1000                         | 1.02                  | Our work |

\* AgNPs, NDP, AuNPs, PDI-SH, GCE, PEDOT, CPE and SPCE represent silver nanoparticles, naphthalene derivate containing piarselenole, gold nanoparticles, thiolated perylene diimides, glassy carbon electrode, poly(3,4)ethylene dioxythiophene, carbon paste electrode and screen printed carbon electrode; respectively.

**Table S4.** Comparison of AIE-based probe for GSH sensing with other previous luminescent approaches.

| Technique   | Applied Materials*                            | Linear range ( $\mu\text{M}$ ) | LOD ( $\mu\text{M}$ ) | Ref.     |
|-------------|-----------------------------------------------|--------------------------------|-----------------------|----------|
| ECL         | GO/CdTe QDs                                   | 24-214                         | 8.3                   | 11       |
| ECL         | CdSe/ZnS QDs                                  | 10-180                         | 1.5                   | 12       |
| CL          | Peroxidase/luminol- $\text{H}_2\text{O}_2$    | 0.75-30                        | 0.75                  | 13       |
| Fluorimetry | N-GQDs/MoS <sub>2</sub>                       | 400-4000                       | 2.47                  | 14       |
| Fluorimetry | MnO <sub>2</sub> /UCNPs                       | N/A                            | 0.9                   | 15       |
| Fluorimetry | TAT-probe                                     | 0-12                           | 5.15                  | 16       |
| Fluorimetry | DTFN                                          | 0-500                          | 1.03                  | 17       |
| Fluorimetry | AuNCs/MnO <sub>2</sub> NS                     | 0-500                          | 4                     | 18       |
| Fluorimetry | TP-N                                          | 0-50                           | 1.53                  | 19       |
| Fluorimetry | N,S-CDs@Cu <sup>2+</sup>                      | 10-150                         | 3.74                  | 20       |
| Fluorimetry | NP-BO-HEM                                     | 0-200                          | 1.37                  | 21       |
| Fluorimetry | Au(I)-SG/Ce(CO <sub>3</sub> ) <sub>2</sub> NS | 0-1000                         | 1.02                  | Our work |

\* GO, QD, GQDs, UCNPs, TAT-probe, DTFN, TP-N and CDs, refer to, graphene oxide, quantum dots, graphene quantum dots, upconversion nanoparticles, two-photon biothiols probe, dual-targeting fluorescence nanoprobe, phthalazinetrione derivative, 2-(benzo[d]thiazol-2-yl)-4-hydroxyphthalazin-1(2H)-one hydrate-dimer, and carbon dots, respectively.

## References

1. I. Sanskriti and K. K. Upadhyay, *New J. Chem.*, 2017, **41**, 4316-4321.
2. K. Xiong, F. Huo, J. Chao, Y. Zhang and C. Yin, *Anal. Chem.*, 2019, **91**, 1472-1478.
3. M. S. Kim, J. M. Jung, J. H. Kang, H. M. Ahn, P.-G. Kim and C. Kim, *Tetrahedron*, 2017, **73**, 4750-4757.
4. C. Jiang, C. Zhang, J. Song, X. Ji and W. Wang, *Spectrochimica Acta Part A: Molecular and Biomolecular Spectroscopy*, 2021, **250**, 119316.
5. X. Zeng, X. Zhang, B. Zhu, H. Jia, W. Yang, Y. Li and J. Xue, *Sensors Actuators B: Chem.*, 2011, **159**, 142-147.
6. R. Rajaram, P. Kanagavalli, S. Senthilkumar and J. Mathiyarasu, *Biotechnology and Bioprocess Engineering*, 2020, **25**, 715-723.
7. M. Cubukcu, F. N. Ertas and U. Anik, *Current Analytical Chemistry*, 2012, **8**, 351-357.
8. B. Perk, Y. T. Buyuksunetci, O. Hakli, C. Xue, Q. Li and U. Anik, *Chemistryselect*, 2021, **6**, 11648-11652.
9. W. T. Wahyuni, E. Rohaeti and D. R. Sari, *IOP Conference Series: Earth and Environmental Science*,

- 2018, **187**, 012078.
10. Z. Buchtova, Z. Lackova, J. Kudr, Z. Zitka, J. Skoda and O. Zitka, *Molecules*, 2018, **23**, 2504.
  11. Y. Wang, J. Lu, L. Tang, H. Chang and J. Li, *Analytical chemistry* 2009, **81**, 9710-9715.
  12. L. Dennany, M. Gerlach, S. O'Carroll, T. E. Keyes, R. J. Forster and P. Bertoncello, *Journal of Materials Chemistry* 2011, **21**, 13984-13990.
  13. T. Kamidate and H. Watanabe, *Talanta*, 1996, **43**, 1733-1738.
  14. S. Tang, C. Yu, L. Qian, C. Zhou, Z. Zhen, B. Liu, X. Cheng and R. Cheng, *Microchem. J.*, 2021, **171**.
  15. R. Deng, X. Xie, M. Vendrell, Y.-T. Chang and X. Liu, *Journal of the American Chemical Society*, 2011, **133**, 20168-20171.
  16. P. Su, Z. Zhu, Y. Tian, L. Liang, W. Wu, J. Cao, B. Cheng, W. Liu and Y. Tang, *Talanta*, 2020, **218**.
  17. H. Wang, P. Zhang, C. Zhang, S. Chen, R. Zeng, J. Cui and J. Chen, *Materials Advances*, 2020, **1**, 1739-1744.
  18. S. Lin, H. Cheng, Q. Ouyang and H. Wei, *Analytical Methods*, 2016, **8**, 3935-3940.
  19. N.-N. Li, N.-N. Shi, D. Yang, R.-X. Wu, C.-G. Xu, B. Zhu, F. Shao, X. Zhang, S.-Y. Bi and Y.-H. Fan, *J. Mol. Liq.*, 2021, **342**.
  20. X. Sun, C. Wang, P. Li, Z. Shao, J. Xia, Q. Liu, F. Shen and Y. Fang, *Food Chem.*, 2022, **372**.
  21. L. Jia, L.-Y. Niu and Q.-Z. Yang, *Anal. Chem.*, 2020, **92**, 10800-10806.
